# Supplementary material
Source: ML conference proceedings conference paper supplement (https://proceedings.mlr.press/v100/ahn20a.html)
Supplement: Supplementary file [file ahn20a-supp.pdf]

## Appendix

### A ROBEL task details

In this section, we outline details of the benchmark task presented in section 4.

#### A.1 D’Claw tasks

The action space of all D’Claw tasks (subsection 4.1) is a 1D vector of 9 D’Claw joint positions.

- (i) **Pose:** This task involves posing D’Claw by driving its joints  $\theta_t$  to a desired joint angles  $\theta_{goal}$  sampled randomly from the feasible joint angle space at the beginning of the episode. The observation space  $s_t$  is a 36-size 1D vector that consists of the current joint angles  $\theta_t$ , the joint velocities  $\dot{\theta}_t$ , the error between the goal and current joint angles, and the last action. The reward function is defined as:

$$r_t = -\|\theta_{goal} - \theta_t\| - 0.1 \left\| \dot{\theta}_t * \mathbb{1}(|\dot{\theta}| > 0.5) \right\|$$

Three variants of this task are provided:

- DClawPoseFixed*: a static variant where the desired joint angles remain constant for the episode
- DClawPoseRandom*: a dynamic variant where the desired joint angle is time-dependent and oscillates between two goal positions that are sampled at the beginning of the episode.
- DClawPoseRandomDynamic*: same as previous. The joint damping, and the joint friction loss are randomized at the beginning of every episode.

Success evaluator metric  $\phi_{se}(\pi)$  of policy  $\pi$  is defined using the mean absolute tracking error being within the threshold  $\beta = 10^\circ$

$$\phi_{se}(\pi) = \mathbb{E}_{\tau \sim \pi} \left[ \frac{1}{T} \sum_{t=0}^T \text{mean} \left\| \theta_{goal}^{(\tau)} - \theta_t^{(\tau)} \right\| < \beta \right]$$

- (ii) **Turn:** This task involves rotating an object from an initial angle  $\theta_{0,obj}$  to a goal angle  $\theta_{goal,obj}$ . The observation space is a 21-size 1D vector of the current joint angles  $\theta_t$ , the joint velocities  $\dot{\theta}_t$ , the sine and cosine values of the object’s angle  $\theta_{t,obj}$ , the last action, and the error between the goal and the current object angle  $\Delta\theta_{t,obj} = \theta_{t,obj} - \theta_{goal,obj}$ . The reward function is defined as

$$r_t = -5|\Delta\theta_{t,obj}| - \|\theta_{nominal} - \theta_t\| - \left\| \dot{\theta}_t \right\| + 10\mathbb{1}(|\Delta\theta_{t,obj}| < 0.25) + 50\mathbb{1}(|\Delta\theta_{t,obj}| < 0.1)$$

Three variants of this task are provided:

- DClawTurnFixed*: constant initial angle ( $0^\circ$ ) and constant goal angle ( $180^\circ$ ).
- DClawTurnRandom*: random initial and goal angle.
- DClawTurnRandomDynamics*: same as previous. The position of the D’Claw relative to the object, the object’s size, the joint damping, and the joint friction loss are randomized at the beginning of every episode.

Success evaluator metric  $\phi_{se}(\pi)$  of policy  $\pi$  is defined using the error in last step of the episode ( $t = T$ ) being within the goal threshold  $\beta = 0.1$  as:

$$\phi_{se}(\pi) = \mathbb{E}_{\tau \sim \pi} [\Delta\theta_{T,obj}^{(\tau)} < \beta]$$

- (iii) **Screw:** This task involves rotating an object at a desired velocity  $\dot{\theta}_{desired}$  from an initial angle. This is represented by a  $\theta_{t,goal}$  that is updated every step as  $\theta_{t,goal} = \theta_{t-1,goal} + \dot{\theta}_{desired} * dt$ . Screw tasks have the same observation space and reward definitions as the Turn tasks. Three variants of this task are provided:

- DClawScrewFixed*: constant initial angle ( $0^\circ$ ) and velocity ( $0.5 \frac{\text{rad}}{\text{sec}}$ )
- DClawScrewRandom*: random initial angle ( $[-180^\circ, 180^\circ]$ ) and desired velocity ( $[-0.75 \frac{\text{rad}}{\text{sec}}, 0.75 \frac{\text{rad}}{\text{sec}}]$ )

- (c) *DClawScrewRandomDynamics*: same as previous. The position of the *D’Claw* relative to the object, the object’s size, the joint damping, and the joint friction loss are randomized at the beginning of every episode.

Success evaluator metric  $\phi_{se}(\pi)$  of policy  $\pi$  is defined using the mean absolute tracking error being within the threshold  $\beta = 0.1$

$$\phi_{se}(\pi) = \mathbb{E}_{\tau \sim \pi} \left[ \frac{1}{T} \sum_{t=0}^T |\Delta \theta_{t,obj}^{(\tau)}| < \beta \right]$$

## A.2 *D’Kitty* tasks

The action space of all of the *D’Kitty* tasks is a 1D vector of 12 joint positions. The observation space shares 49 common entries: the Cartesian position (3), Euler orientation (3), velocity (3), and angular velocity (3) of the *D’Kitty* torso, the joint positions  $\theta$  (12) and velocities  $\dot{\theta}$  (12) of the 12 joints, the previous action (12), and ‘uprightness’  $u_{t,kitty}$  (1). The uprightness  $u_{t,kitty}$  of the *D’Kitty* is measured as it’s orientation projected over the global vertical axis:

$$u_{t,kitty} = \mathbf{R}_{z,t,kitty} \cdot \hat{\mathbf{Z}}$$

The *D’Kitty* tasks share a common term in the reward function  $r_{t,upright}$  regarding uprightness defined as:

$$r_{t,upright} = \alpha_{upright} \frac{u_{t,kitty} - \beta}{1 - \beta} + \alpha_{falling} (u_{t,kitty} < \beta)$$

where  $\beta$  is the cosine similarity threshold with the global z-axis beyond which we consider the *D’Kitty* to have fallen. When perfectly upright  $\alpha_{t,upright}$  reward is collected, when alignment ( $u_{t,kitty}$ ) falls below the threshold  $\beta$ , the episode terminates early and  $\alpha_{falling}$  is collected.

- (i) **Stand**: This task involves *D’Kitty* coordinating its 12 joints  $\theta_t$  to stand upright maintaining a pose specified by  $\theta_{goal}$ . The observation space is a 61-size 1D vector of the shared observation space entries and pose error  $e_{t,pose} = (\theta_{goal} - \theta_t)$ . The reward function is defined as:

$$r_t = r_{t,upright} - 4\bar{e}_{t,pose} - 2\|\mathbf{p}_{t,kitty}\|_2 + 5u_{t,kitty}\mathbb{1}(\bar{e}_{t,pose} < \frac{\pi}{6}) + 10u_{t,kitty}\mathbb{1}(\bar{e}_{t,pose} < \frac{\pi}{12})$$

where  $\bar{e}_{t,pose}$  is mean absolute pose error,  $\mathbf{p}_{t,kitty}$  is the cartesian position of *D’Kitty* on the horizontal plane and the shared reward function constants are  $\alpha_{upright} = 2$ ,  $\alpha_{falling} = -100$ ,  $\beta = \cos(90^\circ)$ .

Three variants of this task are provided:

- DKittyStandFixed*: constant initial pose.
- DKittyStandRandom*: random initial pose.
- DKittyStandRandomDynamics*: same as previous. The joint gains, damping, friction loss, geometry friction coefficients, and masses are randomized. In addition, a randomized height field is generated with heights up to 0.05m

The successor evaluator indicates success if the mean pose error is within the goal threshold  $\beta = \frac{\pi}{12}$  and the *D’Kitty* is sufficiently upright at the last step ( $t = T$ ) of the episode:

$$\phi_{se}(\pi) = \mathbb{E}_{\tau \sim \pi} [\mathbb{1}(\bar{e}_{T,pose}^{(\tau)} < \beta) * \mathbb{1}(u_{T,kitty}^{(\tau)} > 0.9)]$$

- (ii) **Orient**: This task involves *D’Kitty* matching its current facing direction  $\omega_t$  with a goal facing direction  $\omega_{goal}$ , thus minimizing the facing angle error  $e_{t,facing}$  between  $\omega_{desired}$  and  $\omega_t$ . The observation space is a 53-size 1D vector of the shared observation space entries,  $\omega_t$  and  $\omega_{goal}$  represented as unit vectors on the (X,Y) plane, and angle error  $e_{t,facing}$ . The reward function is defined as:

$$\begin{aligned} r_t &= r_{t,upright} - 4e_{t,facing} - 4\|\mathbf{p}_{t,kitty}\|_2 + r_{bonus\_small} + r_{bonus\_big} \\ r_{bonus\_small} &= 5(e_{t,facing} < 15^\circ \text{ or } u_{t,kitty} > \cos(15^\circ)) \\ r_{bonus\_big} &= 10(e_{t,facing} < 5^\circ \text{ and } u_{t,kitty} > \cos(15^\circ)) \end{aligned}$$

where the shared reward function constants are  $\alpha_{upright} = 2$ ,  $\alpha_{falling} = -500$ ,  $\beta = \cos(25^\circ)$ .

Three variants of this task are provided:

- (a) *DKittyOrientFixed*: constant initial facing ( $0^\circ$ ) and goal facing ( $180^\circ$ ).
- (b) *DKittyOrientRandom*: random initial facing ( $[-60^\circ, 60^\circ]$ ) and goal facing ( $[120^\circ, 240^\circ]$ )
- (c) *DKittyOrientRandomDynamics*: same as previous. The joint gains, damping, friction loss, geometry friction coefficients, and masses are randomized. In addition, a randomized height field is generated with heights up to 0.05m

The successor evaluator indicates success if the facing angle error is within the goal threshold and the *D’Kitty* is sufficiently upright at the last step ( $t = T$ ) of the episode:

$$\phi_{se}(\pi) = \mathbb{E}_{\tau \sim \pi} [\mathbb{1}(e_{T, \text{facing}}^{(\tau)} < 5^\circ) * \mathbb{1}(u_{T, \text{kitty}}^{(\tau)} > \cos(15^\circ))]$$

- (iii) **Walk**: This task has the *D’Kitty* move its current Cartesian position  $\mathbf{p}_{t, \text{kitty}}$  to a desired Cartesian position  $\mathbf{p}_{\text{goal}}$ , minimizing the distance  $d_{t, \text{goal}} = \|\mathbf{p}_{\text{goal}} - \mathbf{p}_{t, \text{kitty}}\|_2$ . Additionally, the *D’Kitty* is incentivized to face towards the goal. The heading alignment is calculated as  $h_{t, \text{goal}} = \mathbf{R}_{\dot{y}, t, \text{kitty}} \cdot \frac{\mathbf{p}_{\text{goal}} - \mathbf{p}_{t, \text{kitty}}}{d_{t, \text{goal}}}$ . The observation space is a 52-size 1D vector of the shared observation space entries,  $h_{t, \text{goal}}$  and  $\mathbf{p}_{\text{goal}} - \mathbf{p}_{t, \text{kitty}}$ .

The reward function is defined as:

$$\begin{aligned} r_t &= r_{t, \text{upright}} - 4d_{t, \text{goal}} + 2h_{t, \text{goal}} + r_{\text{bonus\_small}} + r_{\text{bonus\_big}} \\ r_{\text{bonus\_small}} &= 5(d_{t, \text{goal}} < 0.5 \text{ or } h_{t, \text{goal}} > \cos(25^\circ)) \\ r_{\text{bonus\_big}} &= 10(d_{t, \text{goal}} < 0.5 \text{ and } h_{t, \text{goal}} > \cos(25^\circ)) \end{aligned}$$

and the shared reward function constants are  $\alpha_{\text{upright}} = 1$ ,  $\alpha_{\text{falling}} = -500$ ,  $\beta = \cos(25^\circ)$ .

Three variants of this task are provided:

- (a) *DKittyWalkFixed*: constant distance (2m) towards  $0^\circ$ .
- (b) *DKittyWalkRandom*: random distance ( $[1, 2]$ ) towards random angle ( $[-60^\circ, 60^\circ]$ )
- (c) *DKittyWalkRandomDynamics*: same as previous. The joint gains, damping, friction loss, geometry friction coefficients, and masses are randomized. In addition, a randomized height field is generated with heights up to 0.05m

The successor evaluator indicates success if the goal distance is within a threshold and the *D’Kitty* is sufficient upright at the last step of the episode:

$$\phi_{se}(\pi) = \mathbb{E}_{\tau \sim \pi} [\mathbb{1}(d_{T, \text{goal}}^{(\tau)} < 0.5) * \mathbb{1}(u_{T, \text{kitty}}^{(\tau)} > \cos(25^\circ))]$$

### A.3 Safety metrics

The following safety scores are shared between all tasks.

- (i) **Position violations**: This score indicates that the joint positions are near their operating bounds. For the  $N$  joints of the robot, this is defined as:

$$s_{\text{position}} = \sum_{i=1}^N \left( \mathbb{1}(|\theta_i - \beta_{i, \text{lower}}| < \epsilon) + \mathbb{1}(|\theta_i - \beta_{i, \text{upper}}| < \epsilon) \right)$$

where  $\beta_{i, \text{lower}}$  and  $\beta_{i, \text{upper}}$  is the respective lower and upper joint position bound for the  $i$ th joint, and  $\epsilon$  is the threshold within which the joint position is considered to be near the bound.

- (ii) **Velocity violations**: This score indicates that the joint velocities are exceeding a safety limit. For the  $N$  joints of the robot, this is defined as:

$$s_{\text{velocity}} = \sum_{i=1}^N \mathbb{1}(|\dot{\theta}_i| > \alpha_i)$$

where  $\alpha_i$  is the speed limit for the  $i$ th joint.

- (iii) **Current violations**: This score indicates that the joints are exerting forces that exceed a safety limit. For the  $N$  joints of the robot, this is defined as:

$$s_{\text{current}} = \sum_{i=1}^N \mathbb{1}(|k_i| > \gamma_i)$$

where  $\gamma_i$  is the current limit for the  $i$ th joint.

## B Locomotion benchmark performance on *D’Kitty*

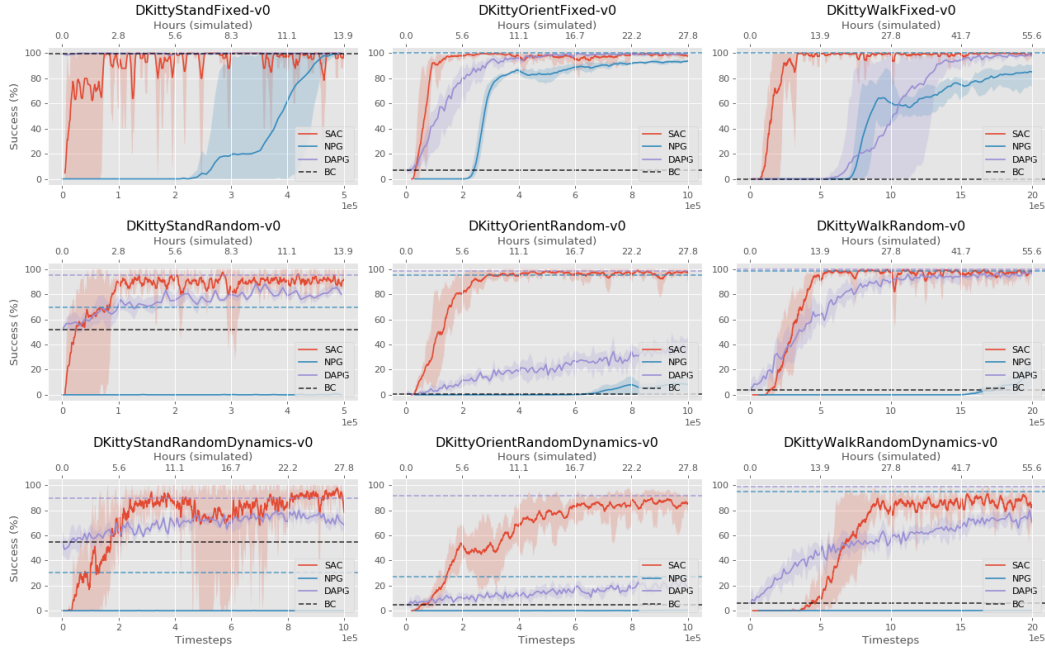

Figure 11: Success percentage (3 seeds) for all *D’Kitty* tasks trained on a simulated *D’Kitty* robot using Soft Actor Critic (SAC), Natural Policy Gradient (NPG), Demo-Augmented Policy Gradient (DAPG), and Behavior Cloning (BC) over 20 trajectories. Each timestep corresponds to 0.1 simulated seconds.

## C *ROBEL* reproducibility

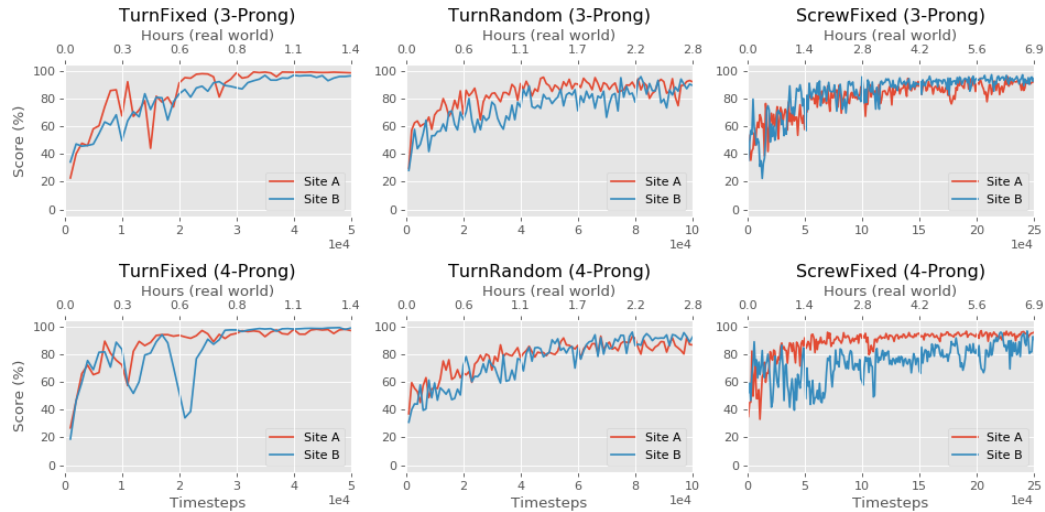

Figure 12: SAC training performance of *D’Claw* tasks on two real *D’Claw* robots each at different laboratory locations. Score denotes the closeness to the goal. Each timestep corresponds to 0.1 simulated seconds. Each task is trained over two different task objects: a 3-prong valve and a 4-prong valve.
